# Supplementary material
Source: Research Square preprint supplement (doi:10.21203/rs.3.rs-9539513/v1)
Supplement: Supplementary file 1 [file 6efcd8416d2bbfec43cbc9fc.docx]

TBEV Hypr_wild type (WT) strain

TBEV Hypr_mCherry strain
